# Supplementary material for: A vascularized crypt-patterned colon model for high-throughput drug screening and disease modelling
Source: Royal Society of Chemistry journal article supplement (doi:10.1039/d3lc00211j), 2023-01-01
Supplement: d3lc00211j4.pdf [file d3lc00211j4.pdf]

## Supporting information

### **Colon Epithelium Barrier with Vascularized Crypts to Model Inflammatory Bowel Disease**

*Alexander Sotra<sup>1</sup>, Kimia Asadi Jozani<sup>1</sup>, and Boyang Zhang<sup>1,2\*</sup>*

<sup>1</sup> School of Biomedical Engineering, McMaster University, Hamilton, Ontario L8S 4L8, Canada;

<sup>2</sup> Department of Chemical Engineering, McMaster University, Hamilton, Ontario L8S 4L8,  
Canada;

\* Corresponding author, orcid.org/0000-0002-2060-5555; Email: [zhangb97@mcmaster.ca](mailto:zhangb97@mcmaster.ca)

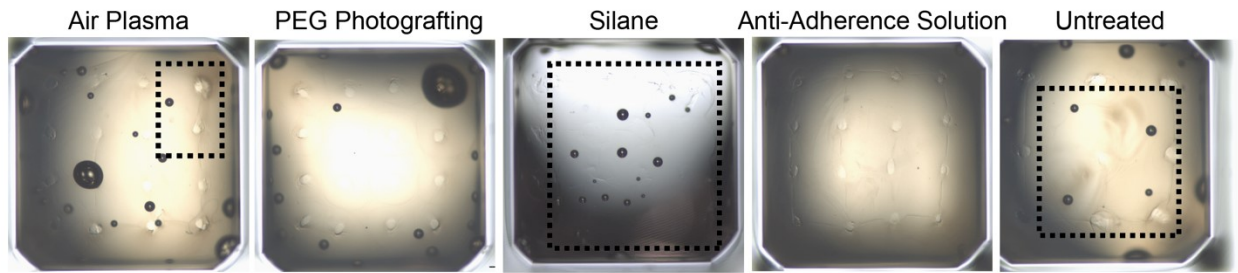

**Supplementary Figure 1. Surface functionalization of TopoStamp pin arrays.** Black boxes outline patterning failure from gel warping.

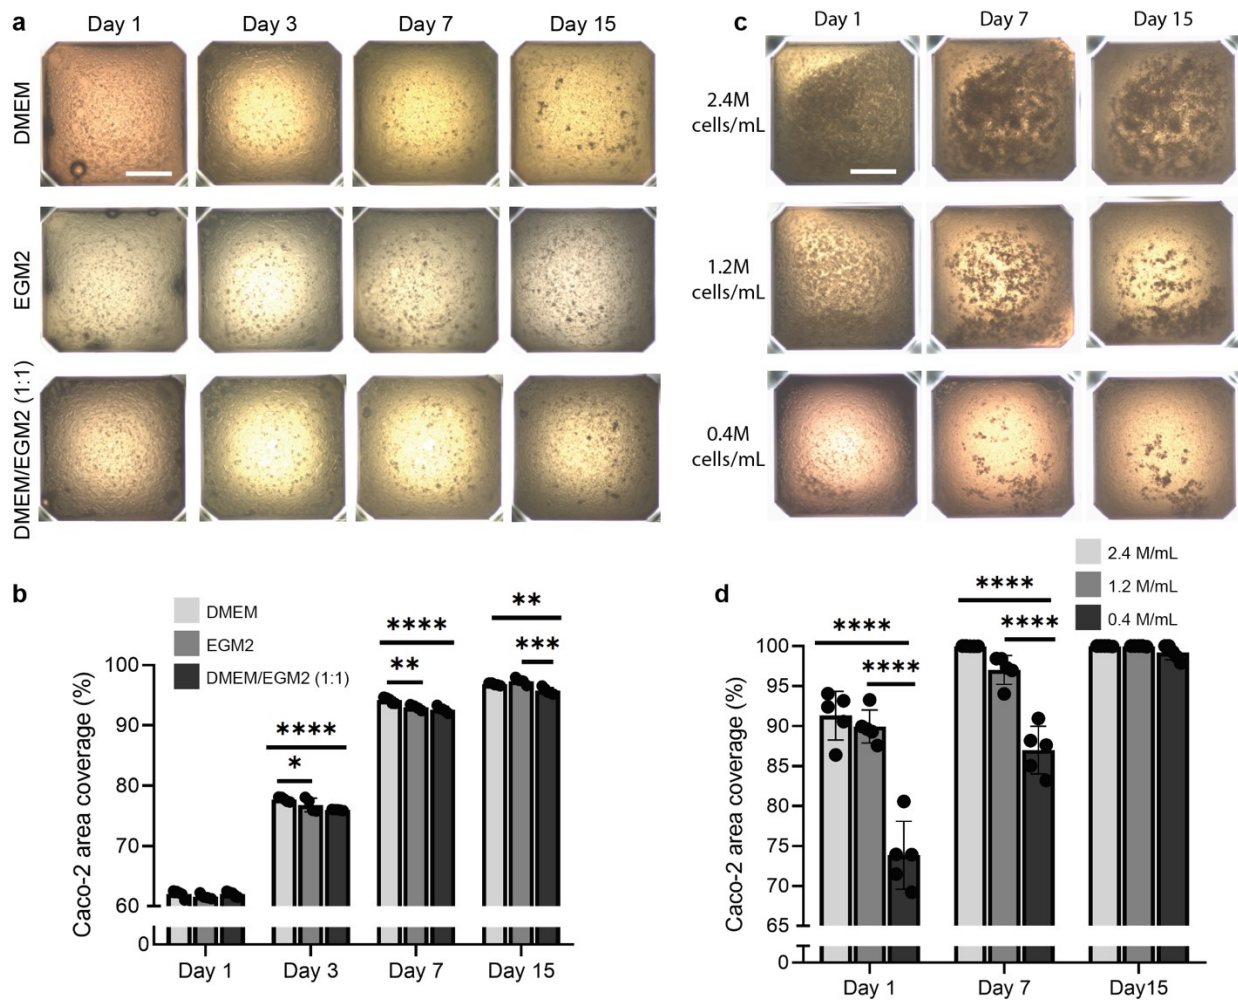

**Supplementary Figure 2. Caco-2 cultivation in various media and seeding densities.** **a**, Brightfield images of Caco-2 proliferation in various cell media. Scale bar, 1 mm. **b**, Quantified Caco-2 proliferation in varying media ( $n =$

5; \* $P < 0.05$  \*\* $P < 0.01$  \*\*\* $P < 0.001$  \*\*\*\* $P < 0.0001$ ). **c**, Brightfield images of Caco-2 expansion at various seeding densities. Scale bar, 1 mm. **d**, Quantification of Caco-2 confluence at varying seeding densities ( $n = 5$ ; \*\*\*\* $P < 0.0001$ ). All data is presented as mean  $\pm$  s.d.

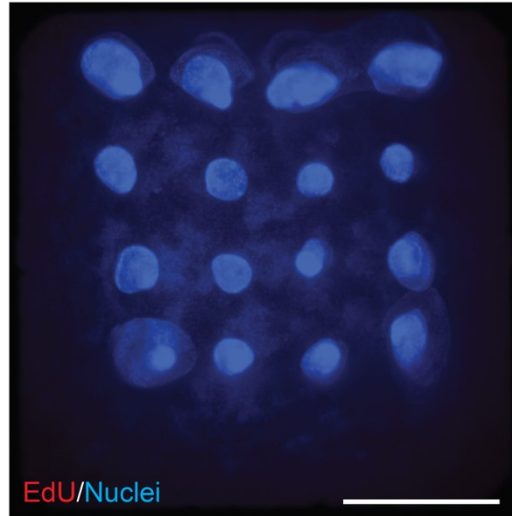

**Supplementary Figure 3. Fluorescence image of Secondary Alexa Fluor™ 647 azide conjugate in EdU-patterned Caco-2 tissues in the IFlowPlate. Edu (red), nuclei (blue). Scale bar, 1 mm.**

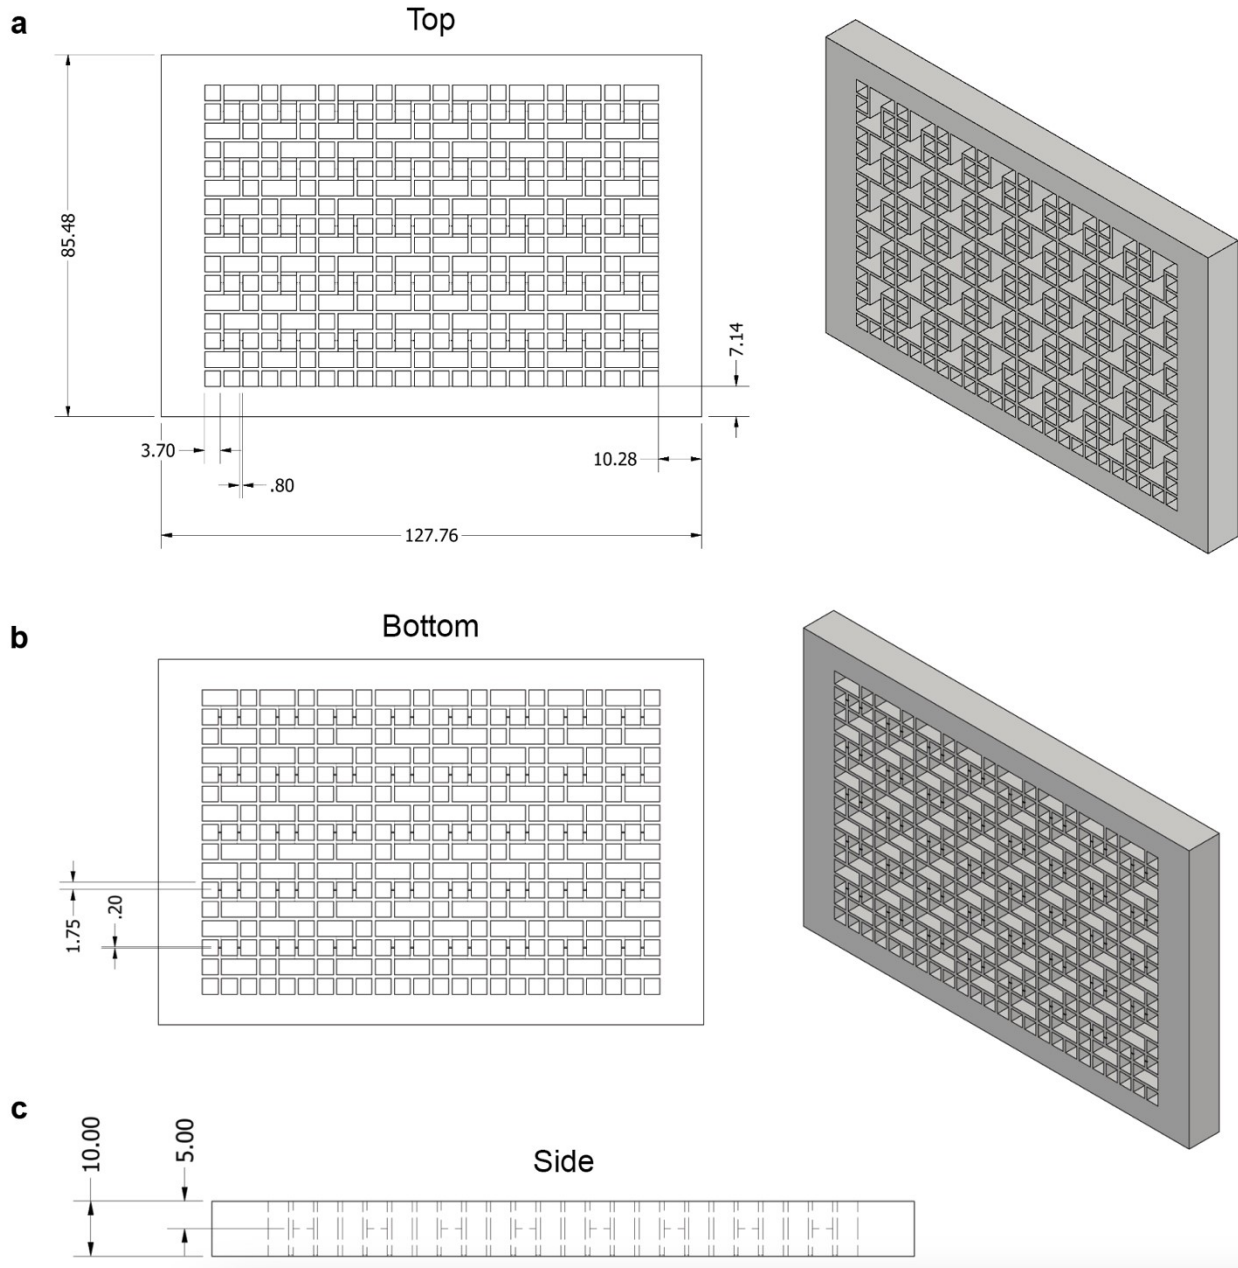

**Supplementary Figure 4. IFlowPlate Duo dimensions. a,** Top-down (left) and oblique (right) views. **b,** Bottom-up (left) and oblique (right) views. **c,** Side view. All dimensions are in millimetres.

**Supplementary Video 1.** Single crypt 3D rotation.

**Supplementary Video 2.** Full crypt-patterned monolayer 3D rotation.

**Supplementary Video 3:** Vascularized crypt-patterned colon epithelium in 3D.
